# Supplementary material for: Long term pronostic value of suPAR in chronic heart failure: reclassification of patients with low MAGGIC score
Source: publisher site journal article supplement (doi:10.1515/cclm-2020-0903), 2021-02-04
Supplement: Supplementary file 1 [file j_cclm-2020-0903_suppl.docx]

Table A : Risk classification analysis at 24-, 42- and 96-month mortality

|  | **All-cause mortality** | | | | | **Cardiovascular mortality** | | | | | | | |
| --- | --- | --- | --- | --- | --- | --- | --- | --- | --- | --- | --- | --- | --- |
|  | supAR vs NT-proBNP | | suPAR vs MAGGIC score | | | supAR vs NT-proBNP | | | | suPAR vs MAGGIC score | | |
|  | NRI (%) | p | | NRI (%) | p | | NRI (%) | p | NRI (%) | | p |
| Months |  |  | |  |  | |  |  |  | |  |
| 24 | 30.8 [10.8-47.7 | 0.004 | | 35 [10.4-51.7] | 0.006 | | 33.6 [ 6- 53.6 ] | 0.018 | 37.8 [2.5-56.7] | | 0.04 |
| 42 | 31.1[13.3-45.7] | **0.002** | | 28.3 [3.3-43.8] | **0.036** | | 35.5 [9.9-52.2] | 0.004 | 31[-2 – 49.7] | | 0.06 |
| 96 | 31.1[10.9-44.2] | **0.004** | | 26.4[1.8-41.5] | **0.038** | | 30 [ 9.1-51] | 0.008 | 31 [1-50.2] | | 0.042 |

Table B : Concentrations of the circulating biomarkers by comorbidities and in their absence.

| Comorbidities | n | NT-proBNP,  ng/L | Hs-cTnT,  ng/L | CRP,  mg/L | sST2,  ng/mL | suPAR, ng/mL |
| --- | --- | --- | --- | --- | --- | --- |
| Hypertension | 114 | 2509 (1043-6518) | 51.6 (25.5-161.5) | 9.6 (2.7-32.7) | 37.61 (20.0-72.6) | 6.0 (3.8-9.1) |
| Diabetes | 63 | 2784 (1630-6136) | 53.7 (31.8-205.4) | 10.3 (2.6-28.0) | 38.3 (21.3-88.2) | 6.2 (4.0-9.3) |
| COPD | 40 | 2309 (982-4893) | 54.9 (21.5-131.2) | 12.8 (3.4-25.9) | 41.8 (19.3-84.1) | 6.1 (3.4-9.0) |
| Chronic kidney disease | 94 | 3511 (1797-9511) | 58.2 (27.1-179.8) | 7.3 (2.6-28.5) | 41.0 (21.6-88.3) | 6.0 (4.4-9.3) |
| Dyslipidemia | 86 | 2693 (1351-6532) | 49.8 (23.5-160.9) | 10.1 (2.5-31.8) | 35.2 (18.4-73.1) | 5.8 (3.9-8.7) |
| No comorbidities | 26 | 1532 (853-3157) | 19.9 (16-44) | 3.1 (1.4-11.2) | 28.3 (15-50) | 3.9 (2.9-5.2) |

COPD, Chronic obstructive pulmonary disease; hs-cTnT, high sensitivity cardiac troponin T; CRP, C reactive protein; sST2, soluble suppression of tumorigenicity 2; suPAR, soluble urokinase-plasminogen activator receptor

Table C : Data for suPAR and NT-proBNP with high and low MAGGIC score.

| Biomarkers | MAGGIC score≤24 | MAGGIC score >24 | p |
| --- | --- | --- | --- |
| NT-proBNP, ng/L | 1577 (583.6-3202) | 3417 (1819-11149) | <0.001 |
| suPAR, ng/mL | 4.59 (2.9-6.9) | 6.01 (4.4-9.6) | <0.001 |
